# Supplementary material for: Modulation of temporal dynamics of gene transcription by activator potency in theDrosophilaembryo
Source: Oxford University Press journal article supplement (doi:10.1242/dev.126946), 2015-01-01
Supplement: dev126946supp.pdf [file dev126946supp.pdf]

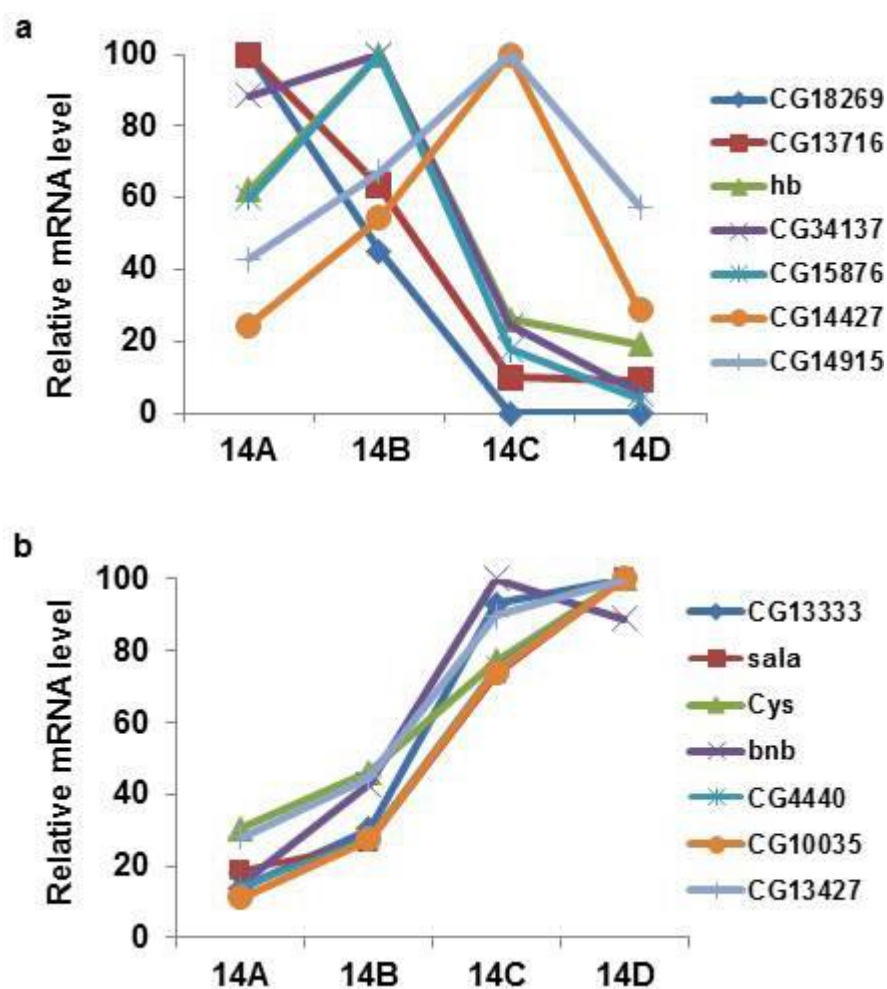

**Supplementary Fig. S1. mRNA profiles during MBT.** (A) Shown are expression levels of representative genes that exhibit properties of transcription shutdown during nc14 (see Supplementary Table S1 for a complete list). CG18269 and CG13716 exhibit a shutdown starting at stage 14A, *hb*, CG34137 and CG 15876 at 14B, and CG14427 and CG14915 at 14C. (B) Shown are expression levels of representative early-expressing genes without exhibiting properties of shutdown at nc14. The seven genes shown were chosen from the non-shutdown gene category with the highest RPKM (see Materials and Methods). In both panels mRNA levels for each gene were normalized with its peak level (set as 100).

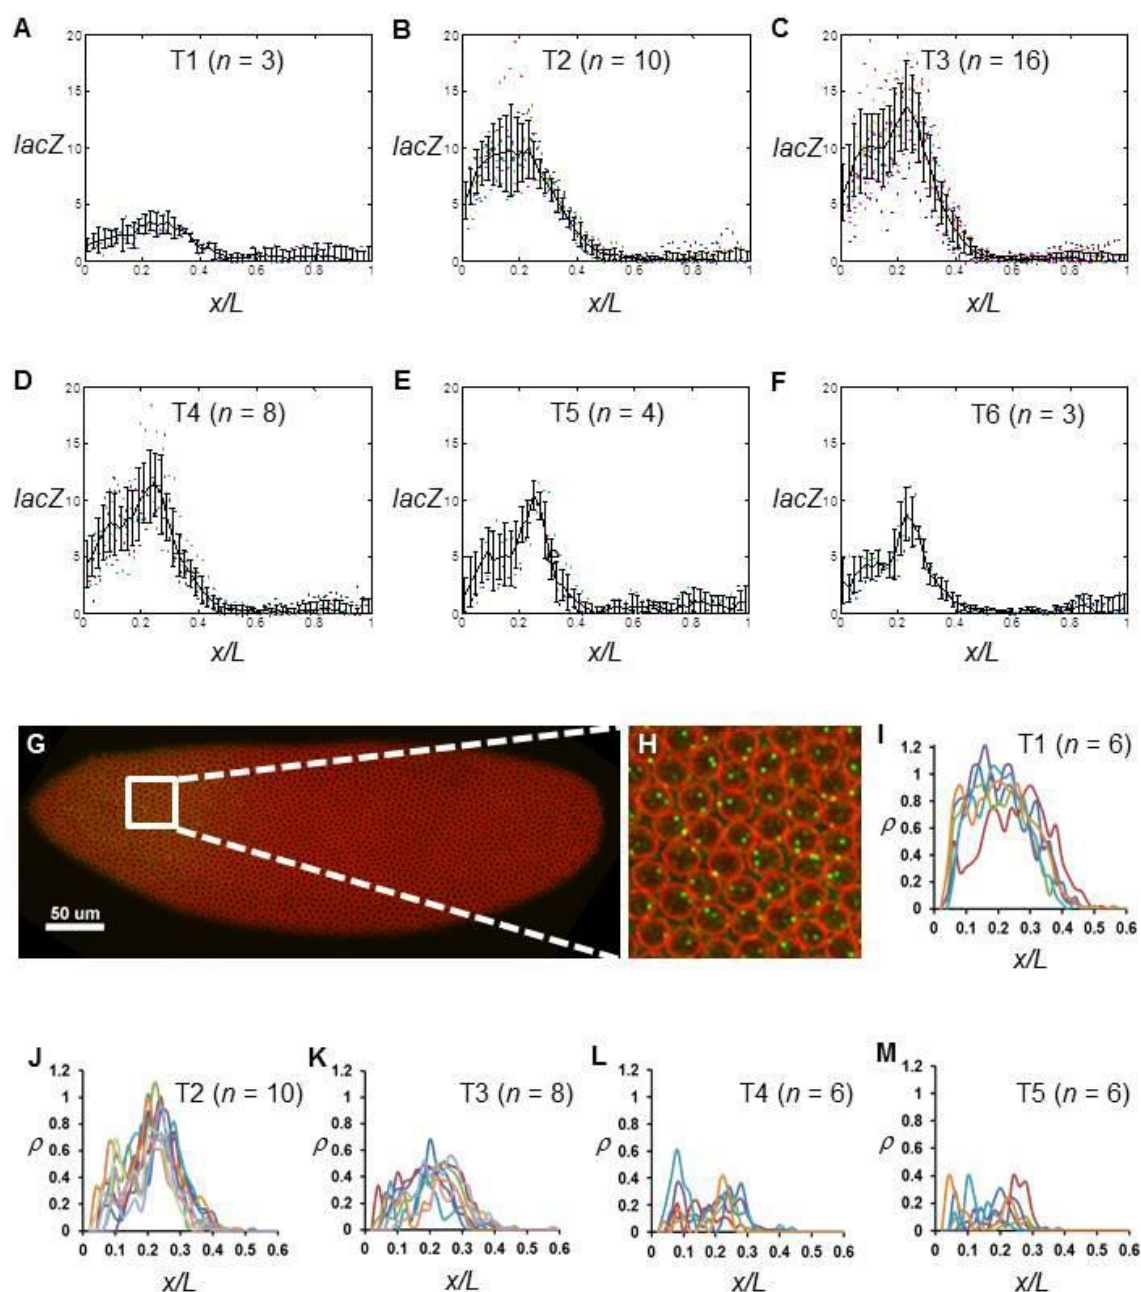

**Supplementary Fig. S2. Temporal dynamics of *bcd6-lacZ* reporter gene transcription.**

(A-F) Intensity profiles of *lacZ* mRNA (in arbitrary units, a.u.) extracted from individual embryos at the indicated time classes. The mean and standard deviation (s.d.) are also shown. (G,H) An image showing the nascent *lacZ* transcripts detected as discrete fluorescent dots and the nuclear envelope shown in red. (I-M)  $\rho$  profiles of *bcd6-lacZ* transcription extracted from individual embryos at the indicated time classes. Each profile represents data from one embryo and is shown by one color in a panel.

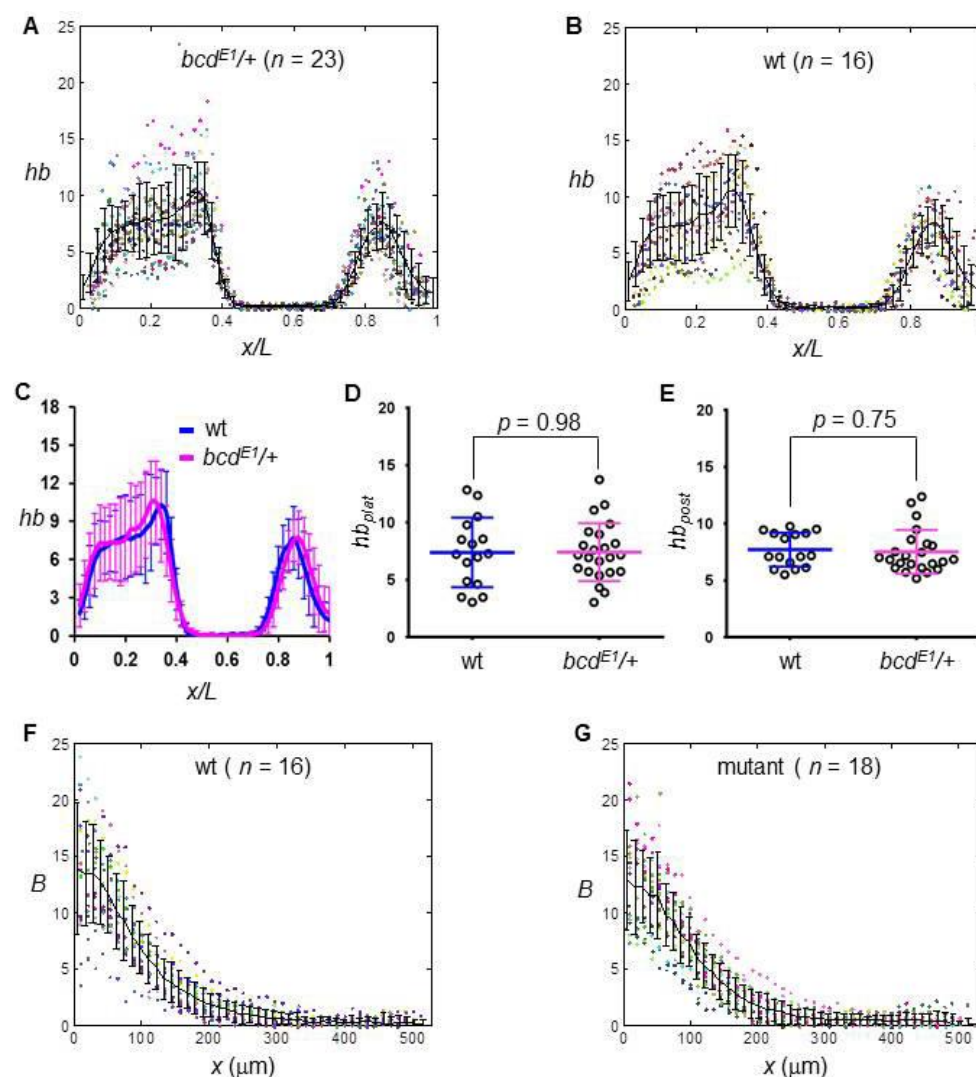

**Supplementary Fig. S3. *hb* and Bcd properties are insensitive to maternal *bcd* gene source (endogenous or transgenic).** (A,B) Intensity profiles of *hb* mRNA (in a.u.) extracted from individual embryos derived from mothers with a copy of either the endogenous wt *bcd* gene or a wt *bcd* transgene (referred to as the  $bcd^{E1/+}$  and “wt” embryos—see main text). (C) The mean *hb* intensity profile from  $bcd^{E1/+}$  and wt embryos. (D,E) Shown are  $hb_{plat}$  and  $hb_{post}$  values from individual wt and  $bcd^{E1/+}$  embryos. The mean  $hb_{plat}$  and s.d. are  $7.42 \pm 2.53$  and  $7.39 \pm 3.03$  and the mean  $hb_{post}$  and s.d. are  $7.53 \pm 1.93$  and  $7.71 \pm 1.50$  in wt and  $bcd^{E1/+}$  embryos, respectively. (F,G) Shown are Bcd intensity profiles (in a.u.) from individual wt and mutant embryos derived from transgenic flies (see Fig. 3a for a plot showing the super-imposed mean profiles).

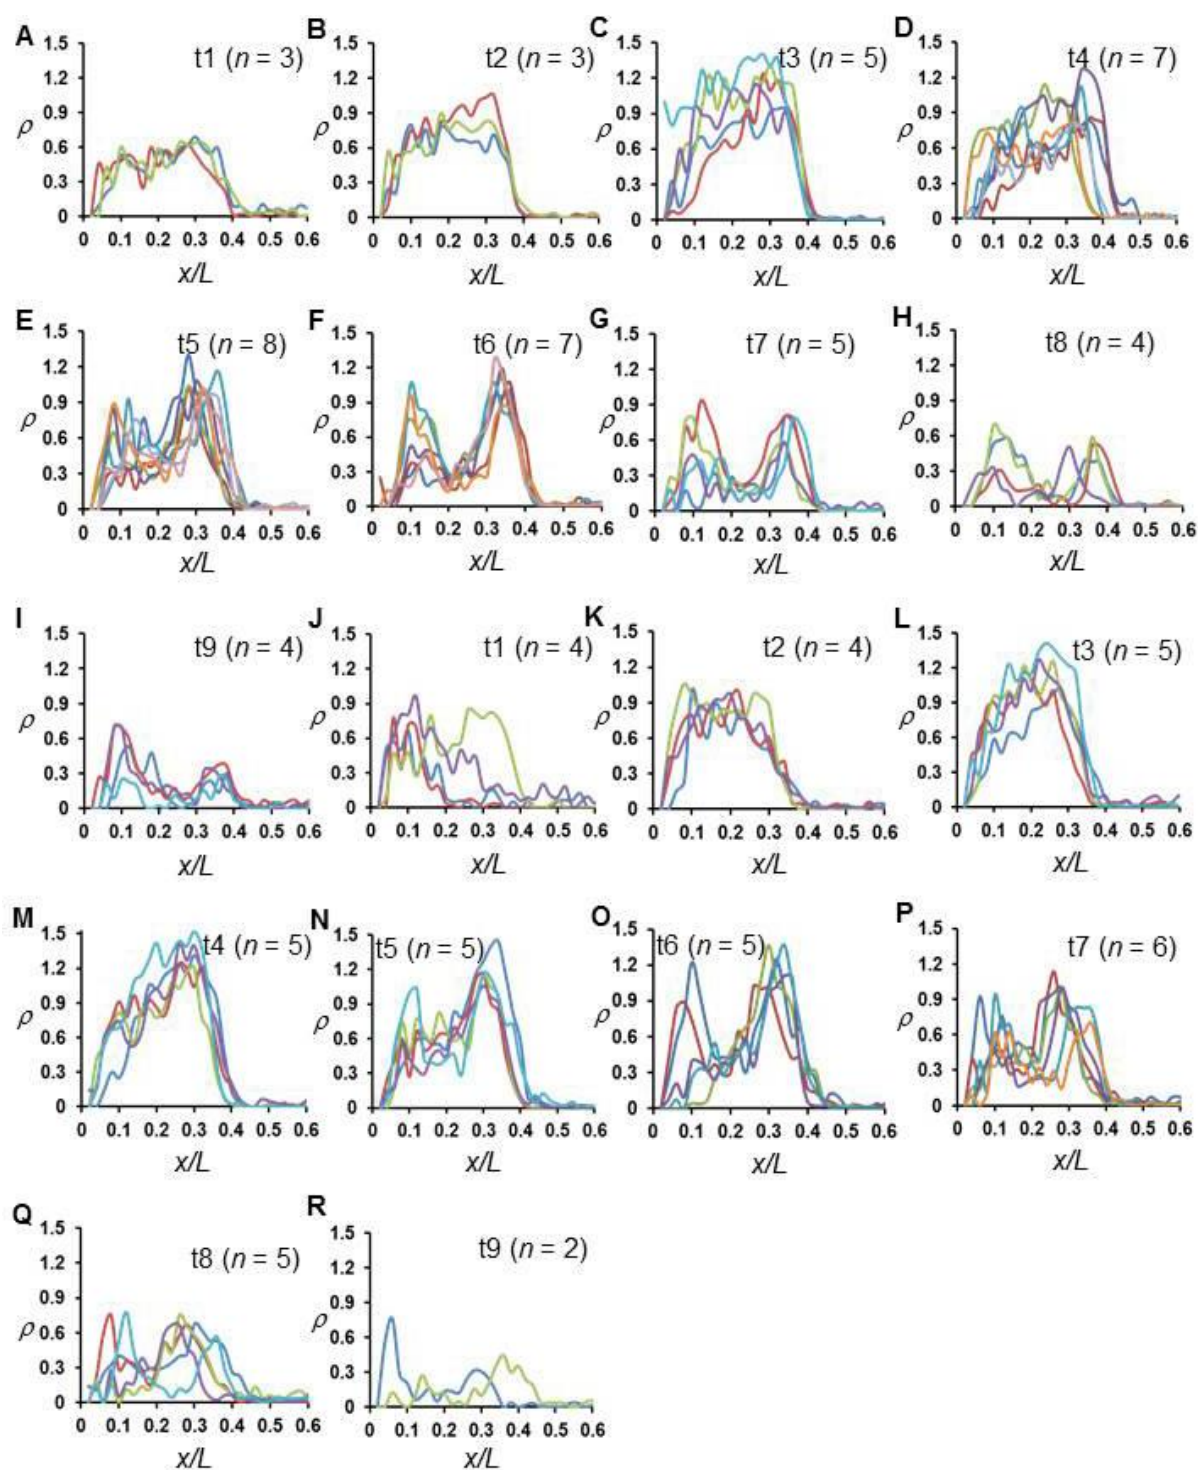

**Supplementary Fig. S4.**  $\rho$  profiles of active *hb* transcription as a function of AP position  $x/L$ . Data are extracted from individual wt (A-I) and mutant (J-R) embryos at the indicated time classes. Each color in a panel represents data from one embryo.



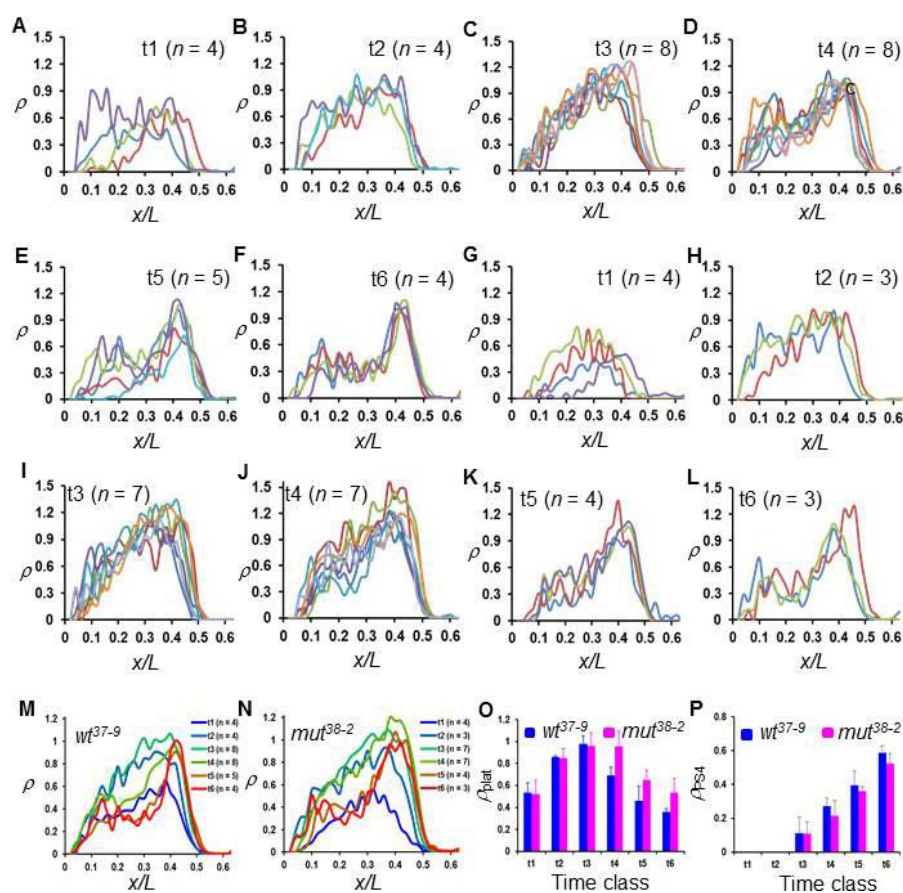

**Supplementary Fig. S5. Postponement in *hb* shutdown detected in embryos derived from an alternate pair of wt and mutant *bcd* transgenic lines.** (A-L)  $\rho$  profiles of *hb* extracted from individual embryos derived from mothers containing two copies of wt (A-F) or mutant (G-L) *bcd* gene generated from standard P-element mediated transformation (referred to as the *wt*<sup>37-9</sup> and *mut*<sup>38-2</sup> embryos, respectively) at the indicated time classes. (M,N) Shown are mean  $\rho$  profiles of *hb* in *wt*<sup>37-9</sup> and *mut*<sup>38-2</sup> embryos at the indicated time classes. (O,P) Shown are the mean and s.d. of  $\rho_{\text{plat}}$  and  $\rho_{\text{PS4}}$  in *wt*<sup>37-9</sup> and *mut*<sup>38-2</sup> embryos at different time classes. The  $p$  values for  $\rho_{\text{plat}}$  between wt and mutant embryos are: 0.87, 0.83, 0.71,  $4.0 \times 10^{-4}$ ,  $4.6 \times 10^{-2}$  and  $4.8 \times 10^{-2}$  for t1 to t6, respectively. The  $\rho_{\text{PS4}}$  values at t1 and t2 are not available in panel P because active transcription specific to PS4 is not yet detectable at these times. The  $p$  values for  $\rho_{\text{PS4}}$  between wt and mutant embryos are: 0.96, 0.14, 0.46 and 0.16 for t3 to t6, respectively.

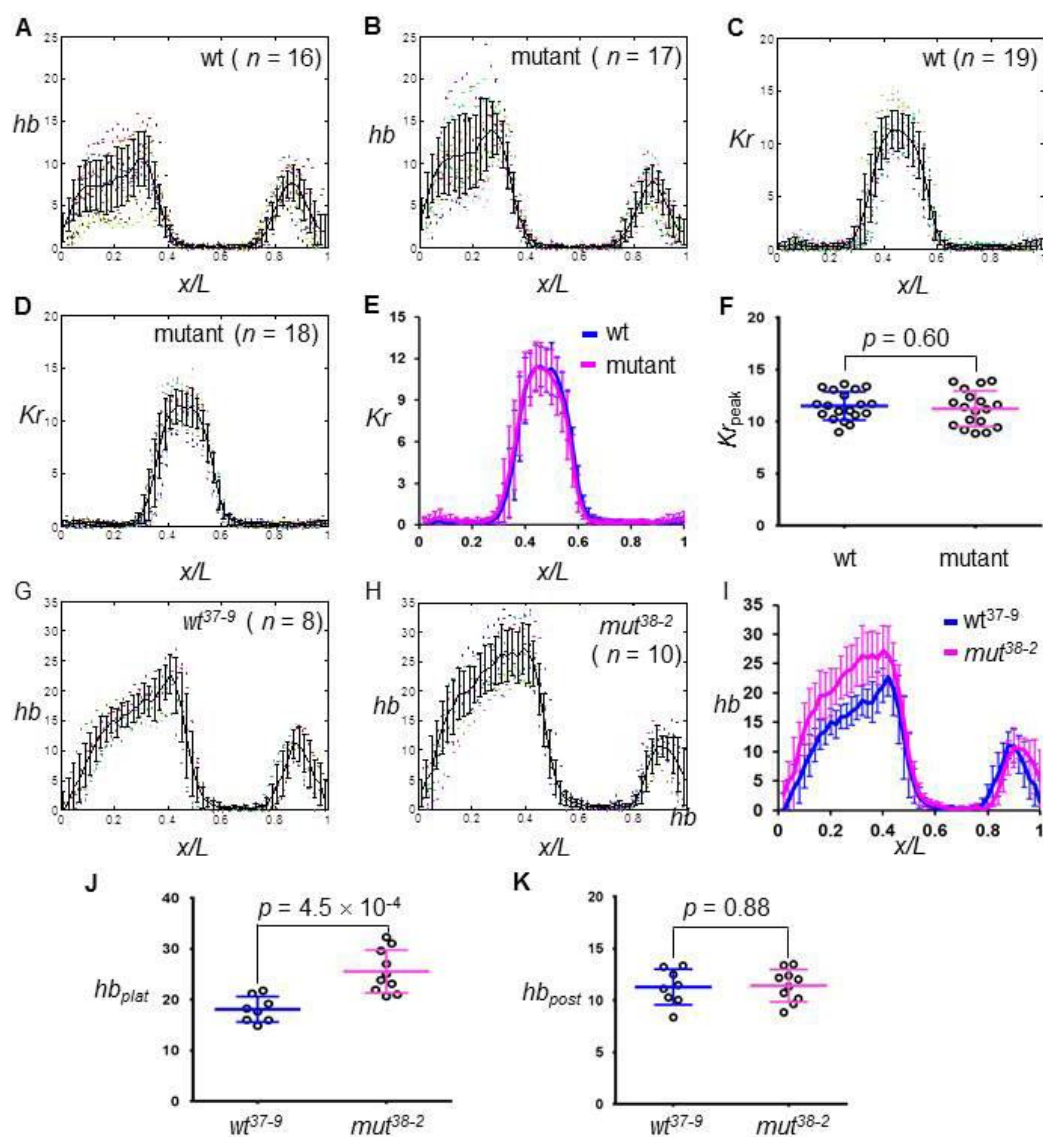

### Supplementary Fig. S6. *hb* mRNA level is increased by Bcd sumoylation mutation.

(A,B) Intensity profiles of *hb* mRNA (in a.u.) extracted from individual wt and mutant embryos, with mean and s.d. given. (C,D) Intensity profiles of *Kr* mRNA (in a.u.) extracted from individual wt and mutant embryos. (E) The mean intensity profile of *Kr* mRNA from wt and mutant embryos. (F) Shown are individual  $Kr_{peak}$  values from wt and mutant embryos. The mean  $Kr_{peak}$  and s.d. are  $11.51 \pm 1.36$  and  $11.24 \pm 1.71$  in wt and mutant embryos, respectively. (G,H) Intensity profiles of *hb* mRNA extracted from individual  $wt^{37-9}$

and  $mut^{38-2}$  embryos. **(I)** The mean intensity profile of  $hb$  mRNA from  $wt^{37-9}$  and  $mut^{38-2}$  embryos. **(J,K)** Shown are the individual  $hb_{plat}$  and  $hb_{pos}$  values from  $wt^{37-9}$  and  $mut^{38-2}$  embryos. The mean  $hb_{plat}$  is increased from  $18.11 \pm 2.51$  in wt to  $25.57 \pm 4.23$  in mutant embryos ( $p = 4.5 \times 10^{-4}$ ) while the mean  $hb_{post}$  is unaffected:  $11.30 \pm 1.71$  and  $11.42 \pm 1.56$  in wt and mutant embryo, respectively ( $p = 0.88$ ).

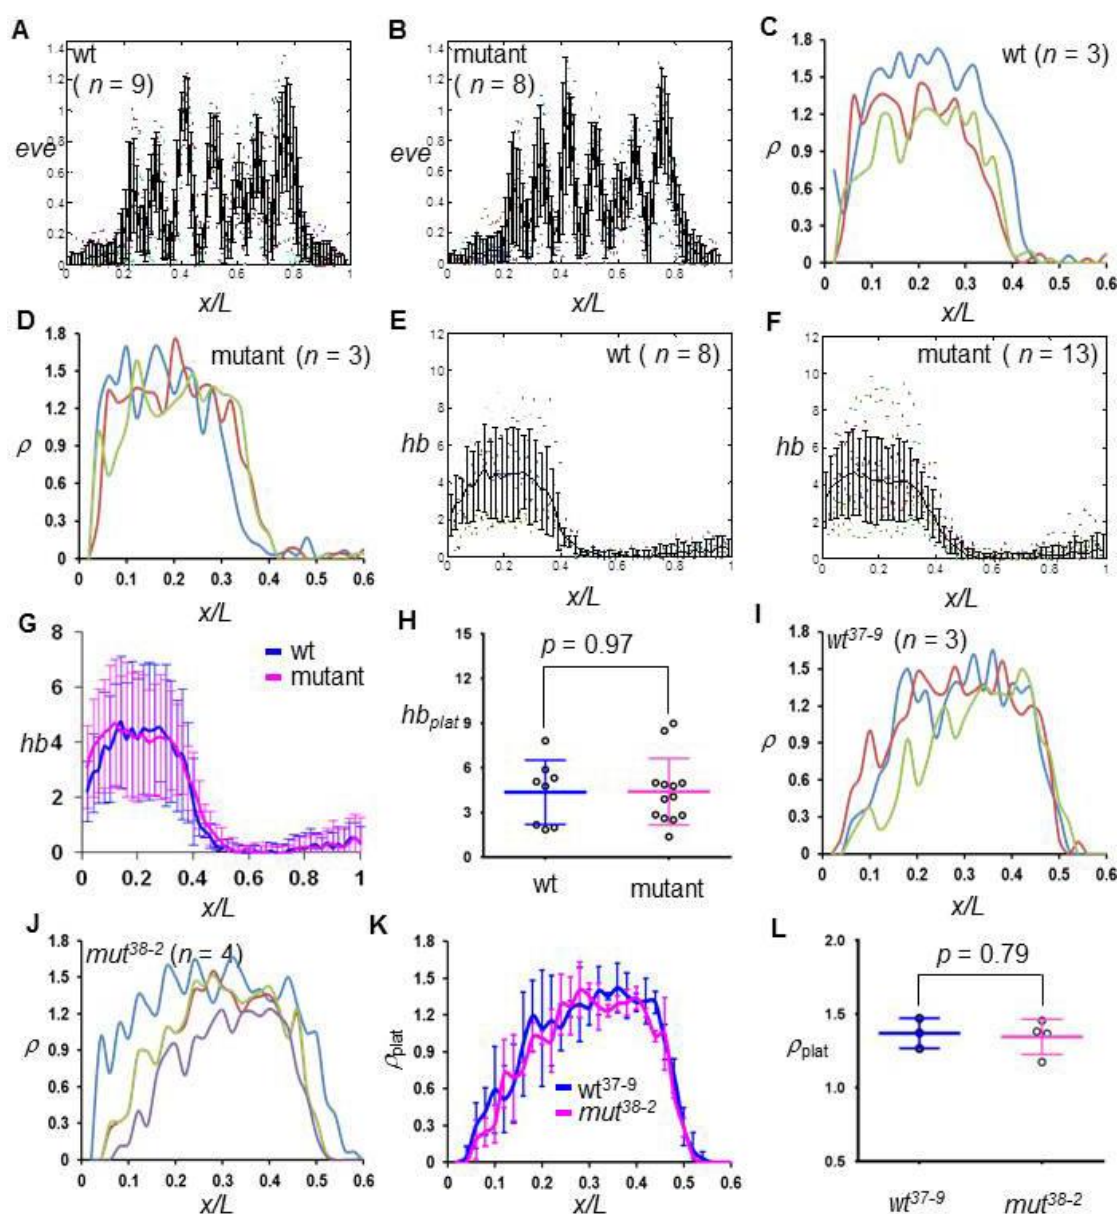

**Supplementary Fig. S7. Individual *eve* intensity profiles at nc14 and *hb* transcription profiles at nc13.** (A,B) Normalized intensity profiles of *eve* mRNA extracted from individual wt and mutant embryos at nc14. (C,D)  $\rho$  profiles of *hb* transcription in individual wt and mutant embryos at nc13. (E,F) Intensity profiles of *hb* mRNA extracted from individual wt and mutant embryos. (G) The mean intensity profiles of *hb* mRNA from wt and mutant embryos at nc13. (H) Shown are  $hb_{plat}$  levels (in a.u.) of individual wt and mutant



embryos at nc13. The mean  $hb_{\text{plat}}$  and s.d. are  $4.35 \pm 2.16$  and  $4.39 \pm 2.24$  in wt and mutant embryos ( $p = 0.97$ ). **(I,J)**  $\rho$  profiles of  $hb$  extracted from individual  $wt^{37-9}$  and  $mut^{38-2}$  embryos at nc13. **(K)**  $\rho$  profiles of  $hb$  from  $wt^{37-9}$  and  $mut^{38-2}$  embryos at nc13. **(L)** Shown are  $\rho_{\text{plat}}$  values measured in individual  $wt^{37-9}$  and  $mut^{38-2}$  embryos at nc13. The mean  $\rho_{\text{plat}}$  and s.d. are  $1.37 \pm 0.10$  and  $1.35 \pm 0.12$  in wt and mutant embryos ( $p = 0.79$ ).

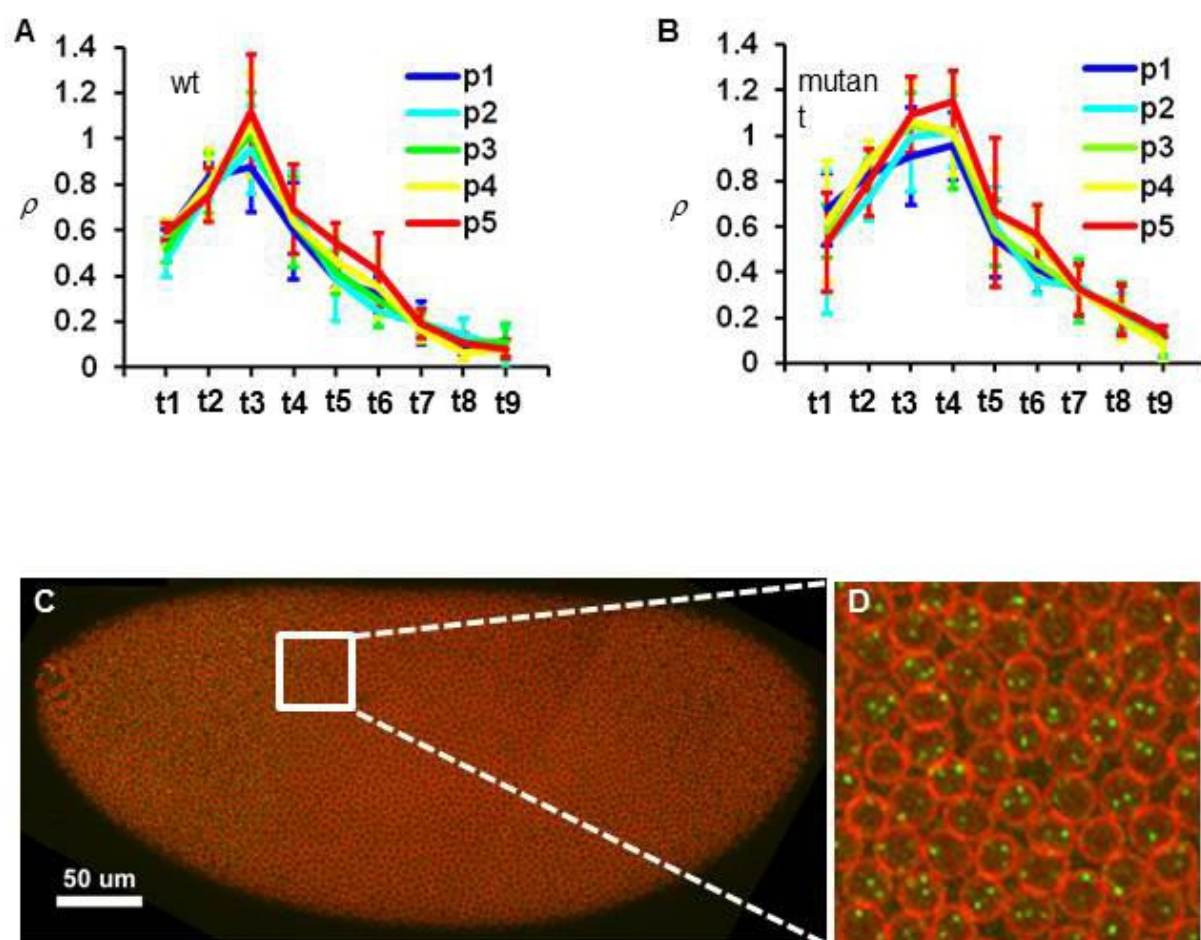

**Supplementary Fig. S8. *hb* transcription shutdown is neither position-dependent nor triggered by DNA replication.** (A,B)  $\rho$  profiles as a function of time class  $t$  from the five individual bins at the plateau region of wt and mutant embryos; here p1 represents the most anterior bin in the plateau, while p5 the most posterior. For either wt or mutant embryos, there is no indication of time-dependent “spreading” of shutdown from posterior to anterior in the plateau region. (C,D) An image of a wt embryo with intron dots shown in green and nuclear envelope in red. Note that many nuclei have  $>2$  bright intron dots detected, indicating that DNA replication has taken place at the *hb* locus in these nuclei.

**Supplementary Table S1 List of shutdown genes (total of 194)**

|         |         |         |         |        |          |           |       |              |       |
|---------|---------|---------|---------|--------|----------|-----------|-------|--------------|-------|
| ac      | CG10877 | CG14787 | CG32711 | CG6885 | Cyp312a1 | hbn       | N     | RpLP2        | Tfb5  |
| Ac78C   | CG10880 | CG14915 | CG3363  | CG7197 | dod      | hkb       | NetA  | RpS5b        | tld   |
| Act5C   | CG11092 | CG15382 | CG34137 | CG7271 | dpp      | hop       | Neu2  | RpS6         | tll   |
| alt     | CG11190 | CG15634 | CG34214 | CG7288 | dsh      | hrg       | Nmt   | run          | Tom40 |
| Amun    | CG11444 | CG15876 | CG34266 | CG7326 | Dsp1     | I-2       | numb  | S6kII        | tsg   |
| Apc2    | CG11534 | CG16890 | CG34401 | CG7332 | east     | kni       | oc    | sc           | wal   |
| Ate1    | CG11582 | CG17829 | CG34422 | CG7598 | Egfr     | l(1)G0334 | os    | scw          | wech  |
| bmm     | CG11943 | CG18269 | CG3446  | CG7872 | egh      | l(1)sc    | Pep   | shn          | wee   |
| bnk     | CG12424 | CG1908  | CG3527  | CG8184 | Eip71CD  | l(2)08717 | Pepck | sick         | wntD  |
| brk     | CG13000 | CG1968  | CG3638  | CG8369 | ERR      | Lnk       | ph-p  | snRNP-U1-70K | yu    |
| Bro     | CG13366 | CG2158  | CG42516 | CG8924 | esg      | m4        | Pink1 | sog          | z     |
| Bsg25A  | CG13653 | CG2247  | CG42553 | CG8928 | exba     | Mad       | Pkn   | Spt6         | Z600  |
| Bsg25D  | CG13711 | CG2469  | CG42558 | CG9281 | exd      | MAN1      | Pp2C1 | Spx          | ZC3H3 |
| Bub1    | CG13713 | CG2712  | CG42575 | CG9425 | Exp6     | Mgat2     | PpV   | SRm160       | zen   |
| bun     | CG13716 | CG2918  | CG4570  | CG9773 | fend     | mip130    | Psf3  | Sry-alpha    |       |
| Bx42    | CG14014 | CG3033  | CG4575  | CG9915 | fliI     | Mis12     | Ptp4E | stwl         |       |
| Cct1    | CG14050 | CG30431 | CG4702  | Corp   | gk       | mnd       | Rab40 | Su(var)2-HP2 |       |
| Cdk7    | CG14317 | CG3149  | CG4785  | Cpr60D | gt       | mRpL14    | Rab8  | Sur-8        |       |
| CG10347 | CG14427 | CG3226  | CG5830  | cm     | halo     | mRpL3     | retn  | Taf4         |       |
| CG10555 | CG14476 | CG3238  | CG6455  | cv     | hb       | mud       | rib   | tay          |       |

## Supplementary Table S2 Functional enrichment of shutdown genes

| Category        | Term                                                                   | No. of genes | P-value (Bonferroni) |
|-----------------|------------------------------------------------------------------------|--------------|----------------------|
| SP_PIR_KEYWORDS | developmental protein                                                  | 35           | 2.14E-11             |
| GOTERM_BP_FAT   | GO:0048598~embryonic morphogenesis                                     | 23           | 4.40E-09             |
| GOTERM_BP_FAT   | GO:0045165~cell fate commitment                                        | 23           | 7.46E-09             |
| GOTERM_BP_FAT   | GO:0007354~zygotic determination of anterior/posterior axis, embryo    | 11           | 1.07E-08             |
| INTERPRO        | IPR007970:Protein of unknown function DUF733                           | 7            | 2.87E-07             |
| GOTERM_BP_FAT   | GO:0003002~regionalization                                             | 28           | 1.21E-06             |
| GOTERM_BP_FAT   | GO:0001703~gastrulation with mouth forming first                       | 10           | 3.11E-06             |
| GOTERM_BP_FAT   | GO:0010004~gastrulation involving germ band extension                  | 10           | 3.11E-06             |
| GOTERM_MF_FAT   | GO:0030528~transcription regulator activity                            | 34           | 6.16E-07             |
| GOTERM_MF_FAT   | GO:0016566~specific transcriptional repressor activity                 | 10           | 6.44E-07             |
| GOTERM_BP_FAT   | GO:0007389~pattern specification process                               | 28           | 4.13E-06             |
| GOTERM_MF_FAT   | GO:0003677~DNA binding                                                 | 37           | 1.83E-06             |
| GOTERM_BP_FAT   | GO:0007369~gastrulation                                                | 12           | 1.33E-05             |
| GOTERM_BP_FAT   | GO:0007167~enzyme linked receptor protein signaling pathway            | 15           | 5.45E-05             |
| GOTERM_BP_FAT   | GO:0009952~anterior/posterior pattern formation                        | 16           | 5.91E-05             |
| GOTERM_BP_FAT   | GO:0001709~cell fate determination                                     | 14           | 1.02E-04             |
| GOTERM_MF_FAT   | GO:0016564~transcription repressor activity                            | 13           | 2.60E-05             |
| GOTERM_BP_FAT   | GO:0048732~gland development                                           | 15           | 2.38E-04             |
| GOTERM_BP_FAT   | GO:0006357~regulation of transcription from RNA polymerase II promoter | 16           | 2.96E-04             |
| GOTERM_BP_FAT   | GO:0007419~ventral cord development                                    | 8            | 4.21E-04             |
| GOTERM_BP_FAT   | GO:0051252~regulation of RNA metabolic process                         | 30           | 4.33E-04             |
| GOTERM_BP_FAT   | GO:0009880~embryonic pattern specification                             | 17           | 5.97E-04             |
| GOTERM_BP_FAT   | GO:0006355~regulation of transcription, DNA-dependent                  | 28           | 6.53E-04             |
